# Supplementary material for: Prognostic Significance of Proteomics‐Discovered Circulating Inflammatory Biomarkers in Patients With Pulmonary Arterial Hypertension
Source: PubMed Central journal article supplement — J Am Heart Assoc. 2024 Jun 11;13(12):e032888. doi: 10.1161/JAHA.123.032888 (PMC11255731; doi:10.1161/jaha.123.032888), 2024-06-11
Supplement: JAH3-13-e032888-s001.pdf [file JAH3-13-e032888-s001.pdf]

# **SUPPLEMENTAL MATERIAL**

**Table S1. Detailed characteristics of human pulmonary arteries used in this study.**

| #  | Category | Origin  | Diagnosis                               | Age | Sex    | WHO class | mPAP | CO   | PVR  |
|----|----------|---------|-----------------------------------------|-----|--------|-----------|------|------|------|
| 1  | CTRL     | Autopsy | Sudden death                            | 43  | Female | NA        | NA   | NA   | NA   |
| 2  | CTRL     | Autopsy | Sudden death                            | 49  | Female | NA        | NA   | NA   | NA   |
| 3  | CTRL     | Biopsy  | Adenocarcinoma                          | 65  | Male   | NA        | NA   | NA   | NA   |
| 4  | CTRL     | Biopsy  | Adenocarcinoma                          | 79  | Female | NA        | NA   | NA   | NA   |
| 5  | CTRL     | Biopsy  | Squamous cell carcinoma                 | 65  | Female | NA        | NA   | NA   | NA   |
| 6  | CTRL     | Biopsy  | Adenocarcinoma + Solitary fibrous tumor | 54  | Female | NA        | NA   | NA   | NA   |
| 7  | CTRL     | Biopsy  | Adenocarcinoma                          | 77  | Male   | NA        | NA   | NA   | NA   |
| 8  | CTRL     | Biopsy  | Squamous cell carcinoma                 | 76  | Male   | NA        | NA   | NA   | NA   |
| 9  | CTRL     | Autopsy | Sudden death                            | 52  | Male   | NA        | NA   | NA   | NA   |
| 10 | CTRL     | Autopsy | Sudden death                            | 29  | Male   | NA        | NA   | NA   | NA   |
| 11 | CTRL     | Autopsy | Sudden death                            | 65  | Male   | NA        | NA   | NA   | NA   |
| 12 | CTRL     | Autopsy | Sudden death                            | 31  | Male   | NA        | NA   | NA   | NA   |
| 13 | CTRL     | Biopsy  | Adenocarcinoma                          | 74  | Female | NA        | NA   | NA   | NA   |
| 14 | CTRL     | Autopsy | Coronary artery disease                 | 78  | Male   | NA        | NA   | NA   | NA   |
| 15 | CTRL     | Autopsy | Sudden death                            | 48  | Female | NA        | NA   | NA   | NA   |
| 16 | PAH      | Biopsy  | PAH-SSc                                 | 36  | Female | III       | 50   | 4,4  | 799  |
| 17 | PAH      | Autopsy | PAH-SSc                                 | 54  | Female | IV        | 48   | 3,7  | 735  |
| 18 | PAH      | Biopsy  | iPAH                                    | 52  | Male   | IV        | 51   | 5,7  | 575  |
| 19 | PAH      | Autopsy | PAH-SSc                                 | 77  | Male   | III       | 47   | 5,4  | 563  |
| 20 | PAH      | Autopsy | PAH-SSc                                 | 47  | Female | III       | 46   | 3,9  | NA   |
| 21 | PAH      | Autopsy | iPAH                                    | 74  | Female | IV        | 35   | 4,1  | NA   |
| 22 | PAH      | Autopsy | PAH-SSc                                 | 72  | Female | IV        | 44   | 3    | 826  |
| 23 | PAH      | Autopsy | PoPH                                    | 46  | Female | IV        | NA   | NA   | NA   |
| 24 | PAH      | Autopsy | PAH-SSc                                 | 53  | Female | IV        | 68   | 5    | 864  |
| 25 | PAH      | Autopsy | Heritable PAH                           | 61  | Female | III       | 66   | 4,5  | 1012 |
| 26 | PAH      | Biopsy  | iPAH                                    | 59  | Male   | IV        | 66   | 6,47 | 630  |
| 27 | PAH      | Autopsy | iPAH                                    | 65  | Male   | III       | 76   | 4,9  | 1125 |
| 28 | PAH      | Biopsy  | PAH-SSc and PVODPAH                     | 45  | Female | IV        | 43   | 7,25 | 375  |
| 29 | PAH      | Autopsy | iPAH                                    | 52  | Male   | IV        | 51   | 2,97 | NA   |
| 30 | PAH      | Autopsy | PVOD-PAH                                | 72  | Female | IV        | 61   | 3,36 | 630  |

CTRL: control; mPAP, mean pulmonary artery pressure; CO: cardiac output; WHO class: World Health Organisation functional class assessed at the time of last clinic visit; iPAH: idiopathic PAH; SScPAH: PAH associated with scleroderma; PVR: pulmonary vascular resistance; PVOD: pulmonary veno-occlusive disease.

**Table S2. Clinical information of human right ventricular samples used in this study.**

| #  | Category | Origin  | Diagnosis               | Age | Sex    | WHO/NYHA class | LVEF (%) | RVSP (mmHg) | TAPSE (mm) | CI (L/min/m <sup>2</sup> ) | Interval between last CI recorded and tissue sampling (days) |
|----|----------|---------|-------------------------|-----|--------|----------------|----------|-------------|------------|----------------------------|--------------------------------------------------------------|
| 1  | CTRL     | Autopsy | Sudden death            | 43  | Female | NA             | NA       | NA          | NA         | NA                         | NA                                                           |
| 2  | CTRL     | Autopsy | Sudden death            | 52  | Male   | NA             | NA       | NA          | NA         | NA                         | NA                                                           |
| 3  | CTRL     | Autopsy | Sudden death            | 29  | Male   | NA             | NA       | NA          | NA         | NA                         | NA                                                           |
| 4  | CTRL     | Autopsy | Sudden death            | 65  | Male   | NA             | NA       | NA          | NA         | NA                         | NA                                                           |
| 5  | CTRL     | Autopsy | Sudden death            | 48  | Female | NA             | NA       | NA          | NA         | NA                         | NA                                                           |
| 6  | CTRL     | Autopsy | Coronary artery disease | 56  | Male   | NA             | NA       | NA          | NA         | NA                         | NA                                                           |
| 7  | CTRL     | Biopsy  | Aortic valve stenosis   | 56  | Male   | NA             | 60       | NA          | 25         | 2,77                       | 56                                                           |
| 8  | CTRL     | Autopsy | Sudden death            | 28  | Male   | NA             | NA       | NA          | NA         | NA                         | NA                                                           |
| 9  | CTRL     | Biopsy  | Aortic valve stenosis   | 46  | Female | NA             | 60       | NA          | 26         | 3,09                       | 72                                                           |
| 10 | CTRL     | Biopsy  | Aortic valve stenosis   | 52  | Female | NA             | 55       | 15          | NA         | 2,53                       | 204                                                          |
| 11 | CTRL     | Biopsy  | Aortic valve stenosis   | 53  | Male   | NA             | NA       | NA          | NA         | NA                         | NA                                                           |
| 12 | CTRL     | Biopsy  | Aortic valve stenosis   | 29  | Male   | II             | 60       | 25          | NA         | 2,79                       | 37                                                           |
| 13 | CTRL     | Biopsy  | Aortic valve stenosis   | 47  | Male   | NA             | 60       | 29          | 23         | NA                         | 25                                                           |
| 14 | CTRL     | Biopsy  | Aortic valve stenosis   | 59  | Male   | NA             | 60       | 20          | 28         | 2,52                       | 63                                                           |
| 15 | CTRL     | Biopsy  | Aortic valve stenosis   | 50  | Male   | NA             | 60       | 30          | NA         | 3,36                       | 63                                                           |
| 16 | CTRL     | Biopsy  | Aortic valve stenosis   | 22  | Male   | NA             | 65       | 20          | NA         | 2,52                       | 15                                                           |
| 17 | CTRL     | Biopsy  | Aortic valve stenosis   | 58  | Male   | NA             | 55       | NA          | NA         | 3,67                       | 84                                                           |
| 18 | CTRL     | Biopsy  | Aortic valve stenosis   | 46  | Male   | NA             | 60       | 2           | 23         | 2,61                       | 107                                                          |
| 19 | PAH      | Autopsy | SSc-PAH                 | 54  | Female | IV             | 60       | 60          | 17         | 1,51                       | 233                                                          |
| 20 | PAH      | Autopsy | SSc-PAH                 | 77  | Male   | III            | 50       | 44          | 13         | 1,7                        | 363                                                          |
| 21 | PAH      | Autopsy | SSc-PAH                 | 47  | Female | III            | 60       | 80          | 12         | 0,7                        | 17                                                           |
| 22 | PAH      | Autopsy | iPAH                    | 74  | Female | IV             | 55       | 84          | NA         | 2,03                       | 667                                                          |
| 23 | PAH      | Autopsy | CHD-PAH                 | 57  | Female | III            | 60       | 53          | 15         | 1,74                       | 174                                                          |
| 24 | PAH      | Autopsy | PoPH                    | 46  | Female | IV             | 80       | 115         | NA         | NA                         | 2                                                            |
| 25 | PAH      | Autopsy | SSc-PAH                 | 53  | Female | iV             | 55       | 110         | NA         | 1,96                       | 124                                                          |
| 26 | PAH      | Autopsy | Heritable PAH           | 61  | Female | III            | 45       | 100         | 16         | 1,73                       | 7                                                            |
| 27 | PAH      | Autopsy | IPAH                    | 65  | Male   | III            | 60       | 100         | NA         | 1,73                       | 162                                                          |
| 28 | PAH      | Autopsy | PVOD-PAH                | 72  | Female | IV             | 65       | 108         | 13         | 2,55                       | 1142                                                         |
| 29 | PAH      | Autopsy | SSc-PAH                 | 62  | Male   | III-IV         | 60       | 62          | 9          | NA                         | 262                                                          |
| 30 | PAH      | Autopsy | SSc-PAH                 | 77  | Female | III            | 50       | NA          | NA         | 1,34                       | 16                                                           |
| 31 | PAH      | Autopsy | PVOD-PAH                | 76  | Female | IV             | 60       | 66          | 16         | 2,25                       | 96                                                           |

CTRL: control; CI: cardiac index; iPAH: idiopathic PAH; LVEF: left ventricular ejection fraction; PVOD: pulmonary veno-occlusive disease; TAPSE: tricuspid annular plane systolic excursion; RVSP, right ventricular systolic pressure; SSc-PAH: PAH associated with scleroderma; WHO class: World Health Organisation functional class assessed at the time of last clinic visit.

**Table S3. Baseline clinical characteristics between the PAH groups.**

|                                           | <b>IPAH<br/>(n=39)</b> | <b>CTD-PAH<br/>(n=21)</b> | <b>P value</b> |
|-------------------------------------------|------------------------|---------------------------|----------------|
| Female, n (%)                             | 23 (59)                | 16 (76)                   | 0.182          |
| Age, years                                | 63±16                  | 69±7                      | 0.031          |
| HPAH, n (%)                               | 2 (5)                  |                           |                |
| WHO functional class, n (%)               |                        |                           | 0.524          |
| I                                         | 0 (0)                  | 0 (0)                     |                |
| II                                        | 7 (18)                 | 3 (14)                    |                |
| III                                       | 27 (69)                | 14 (67)                   |                |
| IV                                        | 5 (13)                 | 4 (19)                    |                |
| Hemodynamics                              |                        |                           |                |
| Mean PAP, mmHg                            | 48±9                   | 43±7                      | 0.043          |
| Mean RAP, mmHg                            | 8±4                    | 8±6                       | 0.943          |
| Cardiac index (L/min/m <sup>2</sup> )     | 2.4±0.7                | 2.5±0.8                   | 0.365          |
| PVR (dynes·s·cm <sup>-5</sup> )           | 842±403                | 812±339                   | 0.775          |
| Heart rate (bpm)                          | 81±12                  | 81±8                      | 0.944          |
|                                           | 63±10                  | 62±7                      | 0.571          |
| NT-                                       | 1364 (3653598)         | 1558 (3054409)            | 0.812          |
| SvO <sub>2</sub> (%)                      | 70±22                  | 66±21                     | 0.539          |
| proBNP (pg/mL)*                           |                        |                           |                |
| eGFR (MDRD)(mL/min/1.73 m <sup>2</sup> )  |                        |                           |                |
| 6-minute walking distance, m              |                        |                           |                |
| PAH medication categories, n (%)          |                        |                           |                |
|                                           | 324±109                | 279±136                   | 0.201          |
|                                           |                        |                           |                |
| None                                      | 25 (64)                | 12 (57)                   | 0.028          |
| Mono therapy                              | 8 (21)                 | 7 (33)                    | 0.019          |
| Double therapy                            | 6 (15)                 | 1 (5)                     | 0.643          |
| Triple therapy                            | 0 (0)                  | 1 (5)                     | 0.459          |
| Specific PAH therapy at enrollment, n (%) |                        |                           |                |
| ERA                                       | 6 (15)                 | 4 (19)                    | 0.298          |
| PDE5 inhibitor                            | 12 (31)                | 7 (33)                    | 0.051          |
| Epoprostenol                              | 2 (5)                  | 1 (5)                     | 0.545          |

Data are expressed by mean±SEM, median (interquartile range)\*, or n (%). PAH, pulmonary arterial hypertension; IPAH, idiopathic pulmonary arterial hypertension; HPAH, heritable PAH; CTD, connective tissue disease; WHO, world health organization; PAP, pulmonary arterial pressure; RAP, right atrium pressure; PVR, pulmonary vascular resistance; SvO<sub>2</sub>, mixed venous oxygen blood saturation; NT-proBNP, N-terminal pro b-type natriuretic peptide; eGFR, estimated glomerular

filtration rate; MDRD, Modification of Diet in Renal Disease; ERA, endothelin receptor antagonist; PDE5, phosphodiesterase type 5.

**Table S4. Univariate Cox proportional hazard analyses for death or lung transplantation in PAH patients.**

|           | Hazard ratio | 95% confidence interval | P value |
|-----------|--------------|-------------------------|---------|
| CRIM1     | 4.619        | 2.144–9.951             | <0.001  |
| HGF       | 2.943        | 1.508–5.744             | 0.002   |
| MATN2     | 2.475        | 0.925–6.618             | 0.071   |
| EGLN1     | 1.081        | 0.802–1.457             | 0.610   |
| ANGPTL4   | 2.401        | 1.285–4.485             | 0.006   |
| FST       | 2.312        | 1.145–4.668             | 0.019   |
| DNPH1     | 0.960        | 0.518–1.779             | 0.896   |
| AGER      | 1.456        | 0.926–2.289             | 0.103   |
| DFFA      | 1.036        | 0.581–1.847             | 0.906   |
| RABGAP1L  | 0.654        | 0.337–1.270             | 0.210   |
| TGFA      | 3.852        | 1.608–9.232             | 0.002   |
| CLEC4D    | 1.396        | 0.837–2.330             | 0.201   |
| CLSTN2    | 2.528        | 1.485–4.304             | 0.001   |
| PKLR      | 0.540        | 0.273–1.068             | 0.077   |
| NBN       | 1.272        | 0.662–2.443             | 0.470   |
| NTF3      | 1.427        | 1.004–2.026             | 0.047   |
| ENPP7     | 1.291        | 0.959–1.739             | 0.092   |
| DAG1      | 2.411        | 1.055–5.512             | 0.037   |
| FSTL3     | 3.635        | 2.061–6.413             | <0.001  |
| TGFB1     | 2.144        | 0.886–5.186             | 0.091   |
| TPP1      | 1.631        | 0.733–3.626             | 0.231   |
| CCL28     | 1.228        | 0.594–2.540             | 0.579   |
| OSM       | 1.021        | 0.713–1.461             | 0.910   |
| AGRN      | 1.761        | 1.001–3.099             | 0.050   |
| PSIP1     | 1.860        | 0.980–3.530             | 0.058   |
| TNFRSF13B | 2.369        | 1.410–3.979             | 0.001   |
| PAPPA     | 2.156        | 1.176–3.953             | 0.013   |
| CXCL10    | 1.017        | 0.711–1.455             | 0.926   |
| SPON1     | 4.602        | 2.215–9.560             | <0.001  |
| VEGFD     | 1.697        | 0.929–3.100             | 0.085   |
| CXCL17    | 2.285        | 1.267–4.119             | 0.006   |
| NCF2      | 1.269        | 0.811–1.984             | 0.297   |
| CCN2      | 0.816        | 0.426–1.563             | 0.540   |
| HEXIM1    | 1.153        | 0.792–1.678             | 0.457   |
| IRAK1     | 1.048        | 0.650–1.689             | 0.848   |
| ESM1      | 2.202        | 1.289–3.762             | 0.004   |
| GZMB      | 0.770        | 0.498–1.190             | 0.240   |
| CCL21     | 0.969        | 0.586–1.601             | 0.901   |
| PIK3AP1   | 0.810        | 0.464–1.415             | 0.460   |
| ENAH      | 2.455        | 1.299–4.640             | 0.006   |
| LAP3      | 0.769        | 0.414–1.428             | 0.405   |
| GMPR      | 0.959        | 0.578–1.592             | 0.872   |
| PLAUR     | 5.902        | 2.672–13.039            | <0.001  |
| AGRP      | 1.652        | 0.977–2.795             | 0.061   |
| NPPC      | 1.781        | 1.056–3.003             | 0.030   |
| LHPP      | 0.689        | 0.392–1.211             | 0.196   |
| ICAM4     | 1.518        | 0.954–2.416             | 0.078   |
| VEGFA     | 0.825        | 0.458–1.488             | 0.523   |
| MZB1      | 1.668        | 0.999–2.787             | 0.051   |
| MGMT      | 1.033        | 0.803–1.330             | 0.799   |

|         |       |             |       |
|---------|-------|-------------|-------|
| ATP5IF1 | 1.040 | 0.801–1.351 | 0.767 |
|---------|-------|-------------|-------|

AGER: advanced glycosylation end-product specific receptor; AGRN: agrin; AGRP: agouti related neuropeptide; ANGPTL4: angiopoietin Like 4; ATP5IF1: ATP synthase inhibitory factor subunit 1; CCL21: C-C motif chemokine ligand 21; CCL28: C-C motif chemokine ligand 28; CCN2: cellular communication network factor 2; CLEC4D: C-type lectin domain family 4 member D; CLSTN2: calstentenin 2; CRIM1: cysteine rich transmembrane BMP regulator 1; CXCL10: C-X-C motif chemokine ligand 10; CXCL17: C-X-C motif chemokine ligand 17; DAG1: dystroglycan 1; DFFA: DNA fragmentation factor subunit alpha; DNPH1: 2'-Deoxynucleoside 5'Phosphate N-Hydrolase 1; EGLN1: Egl-9 family hypoxia inducible factor 1; ENAH: ENAH actin regulator; ENPP7: ectonucleotide pyrophosphatase/phosphodiesterase 7; ESM1: endothelial cell specific molecule 1; FST: follistatin; FSTL3: follistatin-like 3; GMPR: guanosine monophosphate reductase; GZMB: granzyme B; HEXIM1: HEXIM P-TEFb complex subunit 1; HGF: hepatocyte growth factor; ICAM4: intercellular adhesion molecule 4; IRAK1: interleukin 1 receptor associated kinase 1; LAP3: leucine aminopeptidase 3; LHPP: phospholysine phosphohistidine inorganic pyrophosphate phosphatase; MATN2: matrilin-2; MGMT: O-6-methylguanine-DNA methyltransferase; MZB1: marginal zone B and B1 cell specific protein; NBN: nibrin; NCF2: neutrophil cytosolic factor 2; NPPC: natriuretic peptide C; NTF3: neurotrophin 3; OSM: oncostatin M; PAPP: pappalysin 1; PIK3AP1: phosphoinositide-3-kinase adaptor protein 1; PKLR: pyruvate kinase L/R; PLAUR: plasminogen activator, urokinase receptor; PSIP1: PC4 and SRSF1 interacting protein 1; RABGAP1L: RAB GTPase activating protein 1 like; SPON1: spondin 1; TGFA: transforming growth factor alpha; TGFB1: transforming growth factor beta 1; TNFRSF13B: TNF receptor superfamily member 13B; TPP1: tripeptidyl peptidase 1; VEGFA: vascular endothelial growth factor A; VEGFD: vascular endothelial growth factor D.



**Table S5. The area under the curves from time-dependent receiver operating characteristic curves for death or lung transplantation in PAH patients.**

| Variables | Area under the curve of 1 year | P value | Area under the curve of 3 years | P value |
|-----------|--------------------------------|---------|---------------------------------|---------|
| CRIM1     | 0.808<br>(0.667–0.938)         | <0.001  | 0.677<br>(0.519–0.832)          | 0.032   |
| HGF       | 0.647<br>(0.438–0.857)         | 0.179   | 0.646<br>(0.475–0.792)          | 0.091   |
| CLSTN2    | 0.766<br>(0.589–0.923)         | 0.006   | 0.713<br>(0.562–0.856)          | 0.008   |
| FSTL3     | 0.872<br>(0.707–1.000)         | 0.003   | 0.743<br>(0.592–0.884)          | 0.007   |
| SPON1     | 0.761<br>(0.578–0.920)         | 0.007   | 0.693<br>(0.545–0.826)          | 0.017   |
| PLAUR     | 0.802<br>(0.625–0.966)         | 0.003   | 0.769<br>(0.629–0.903)          | <0.001  |

Data are shown in the area under the curves and 95% confidence intervals. CLSTN2: calstentenin 2; CRIM1: cysteine rich transmembrane BMP regulator 1; FSTL3: follistatin-like 3; HGF: hepatocyte growth factor; PLAUR: plasminogen activator, urokinase receptor; SPON1: spondin 1.

**Table S6. C-statistics of biomarkers with 2015 ESC/ERS risk score, REVEAL 2.0 risk score, and refined 4-strata risk assessment in PAH patients for death or lung transplantation.**

| Variables        | 2015 ESC/ERS risk score               | P value vs. Reference | REVEAL 2.0 risk score                 | P value vs. Reference | Refined 4strata risk assessment       | P value vs. Reference |
|------------------|---------------------------------------|-----------------------|---------------------------------------|-----------------------|---------------------------------------|-----------------------|
| Risk score alone | 0.561<br>(0.456–0.667)<br>(Reference) | -                     | 0.663<br>(0.523–0.803)<br>(Reference) | -                     | 0.590<br>(0.453–0.727)<br>(Reference) | -                     |
| + CRIM1          | 0.798<br>(0.683–0.913)                | <0.001                | 0.799<br>(0.684–0.915)                | 0.036                 | 0.797<br>(0.681–0.913)                | 0.008                 |
| + HGF            | 0.685<br>(0.548–0.823)                | 0.043                 | 0.697<br>(0.560–0.834)                | 0.515                 | 0.679<br>(0.540–0.818)                | 0.186                 |
| + CLSTN2         | 0.661<br>(0.523–0.799)                | 0.143                 | 0.688<br>(0.552–0.824)                | 0.571                 | 0.657<br>(0.518–0.796)                | 0.331                 |
| + FSTL3          | 0.770<br>(0.651–0.889)                | 0.003                 | 0.768<br>(0.648–0.888)                | 0.116                 | 0.767<br>(0.646–0.887)                | 0.024                 |
| + SPON1          | 0.834<br>(0.730–0.938)                | <0.001                | 0.832<br>(0.728–0.936)                | 0.017                 | 0.831<br>(0.726–0.935)                | 0.002                 |
| + PLAUR          | 0.753<br>(0.626–0.881)                | 0.008                 | 0.742<br>(0.613–0.871)                | 0.183                 | 0.748<br>(0.619–0.876)                | 0.036                 |

CLSTN2: calyntenin 2; CRIM1: cysteine rich transmembrane BMP regulator 1; ERS, European Respiratory Society; ESC, European Society of Cardiology; FSTL3: follistatin-like 3; HGF: hepatocyte growth factor; IDI, integrated discrimination improvement; NRI, net reclassification improvement; PLAUR: plasminogen activator, urokinase receptor; SPON1: spondin 1.

**Figure S1. CLSTN2, HGF, SPON1, CRIM1, PLAUR and FSTL3 and hemodynamic/biochemical parameters of PAH patients.**

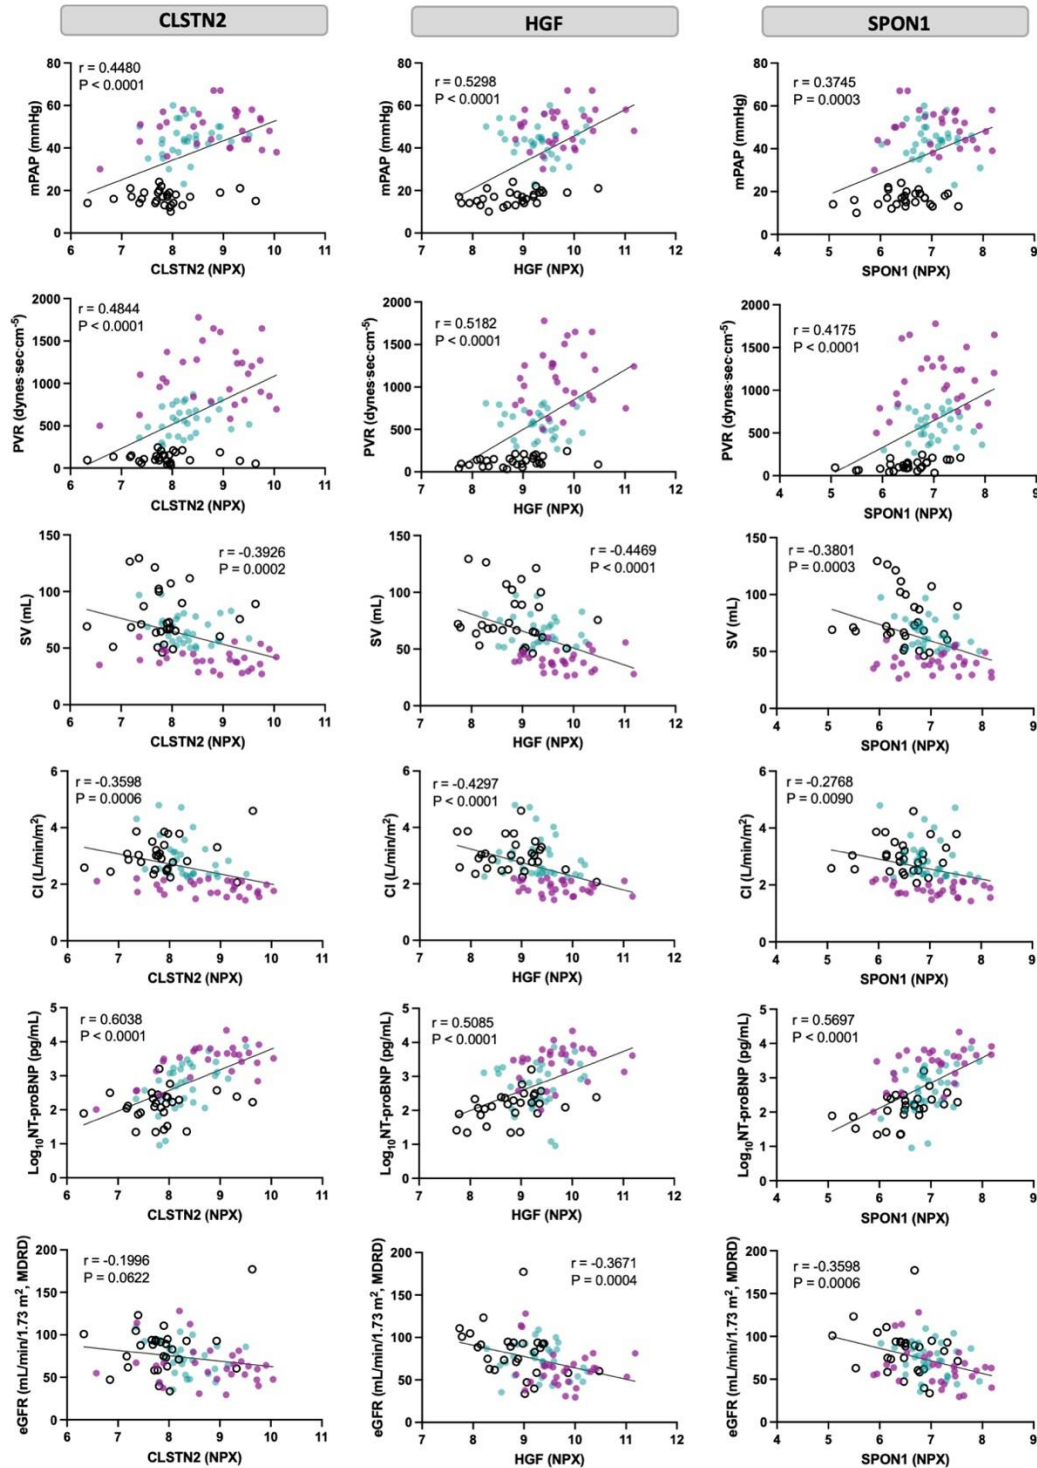

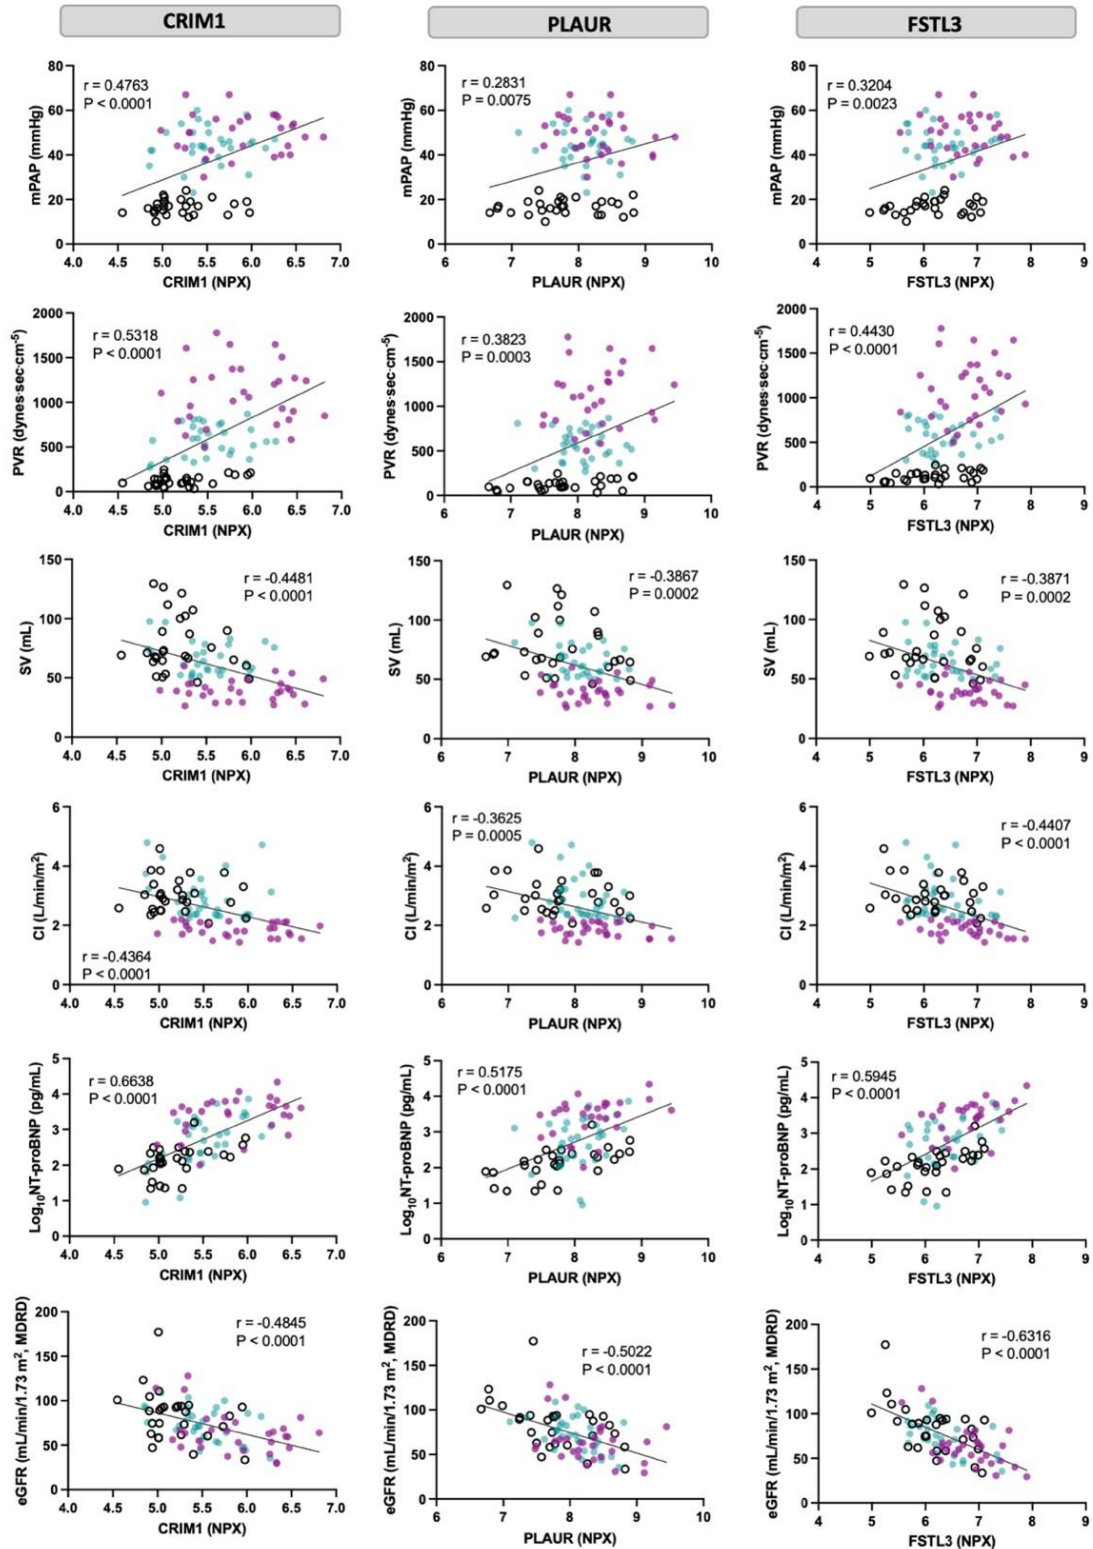

Pearson correlation coefficient with associated  $P$  value is shown in each graph. Open circles represent controls. Blue and purple circle represent cRV and dRV PAH patients, respectively. CI,

cardiac index; CLSTN2: calyntenin 2; CRIM1: cysteine rich transmembrane BMP regulator 1; eGFR, estimating glomerular filtration rate; FSTL3: follistatinlike 3; HGF: hepatocyte growth factor; mPAP, mean pulmonary artery pressure; NT-proBNP: Nterminal pro b-type natriuretic peptide; PLAUR: plasminogen activator, urokinase receptor; PVR, pulmonary vascular resistance; SPON1: spondin 1; SV, stroke volume.

Figure S2. Comparison of areas under the ROC curves between identified proteins and NTproBNP for the prediction of survival in PAH patients.

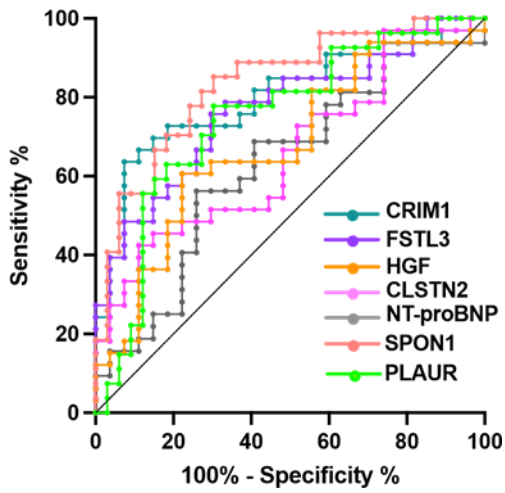

CLSTN2: calyntenin 2; CRIM1: cysteine rich transmembrane BMP regulator 1; FSTL3: follistatin-like 3; HGF: hepatocyte growth factor; NT-proBNP: N-terminal pro b-type natriuretic peptide; PLAUR: plasminogen activator, urokinase receptor; SPON1: spondin 1.
